# Supplementary material for: Mass spectrometry-based investigation of measles and mumps virus proteome
Source: Springer Nature journal article supplement (doi:10.1186/s12985-018-1073-9), 2018-10-16
Supplement: 12985_2018_1073_MOESM1_ESM.pdf [file 12985_2018_1073_MOESM1_ESM.pdf]

**Table S1.** Proteins coded by MEV genome (Edmonston-Zagreb strain, GenBank: AY486083.1)

| protein                                     | CDS          | #aa  | $M_r$  | $pI$  | GI (NCBI) | UniProt entry |
|---------------------------------------------|--------------|------|--------|-------|-----------|---------------|
| nucleoprotein, N                            | 108 – 1685   | 525  | 58131  | 5.15  | 39932887  | Q89933        |
| phosphoprotein, P                           | 1807 – 3330  | 507  | 53957  | 5.07  | 39932888  | Q77M25        |
| V                                           | 1807 – 2705  | 299  | 32074  | 4.80  | 39932889  | Q77M24        |
| C                                           | 1829 – 2389  | 186  | 21037  | 10.31 | 39932890  | Q77M23        |
| matrix protein, M                           | 3438 – 4445  | 335  | 37749  | 9.24  | 39932891  | Q6RXY8        |
| fusion protein, F <sub>0</sub> *            | 5449 – 7110  | 553  | 59864  | 8.87  | 39932892  | O93055        |
| fusion protein fragment 1, F <sub>1</sub> # | -            | 438  | 47069  | 6.28  | -         | -             |
| fusion protein fragment 2, F <sub>2</sub> # | -            | 115  | 12812  | 11.46 | -         | -             |
| hemagglutinin, H*                           | 7271 – 9124  | 617  | 69162  | 6.74  | 39932893  | Q9IC33        |
| large polymerase, L                         | 9234 – 15785 | 2183 | 247747 | 8.40  | 39932894  | Q77M22        |

CDS - coding sequence; aa – amino acid; \* - glycoproteins, real  $M_r$  differs from theoretical because of posttranslationally added glycans; # fragments F<sub>1</sub> and F<sub>2</sub> are produced from F<sub>0</sub> by cleavage with cell protease furin which recognizes RRHKR motif

**Table S2.** Proteins coded by MUV genome (L-Zagreb strain, GenBank: AY685921.1)

| protein                                                | CDS          | #aa  | $M_r$  | <i>pI</i> | GI (NCBI) | UniProt entry |
|--------------------------------------------------------|--------------|------|--------|-----------|-----------|---------------|
| nucleoprotein, NP                                      | 146 – 1795   | 549  | 61336  | 5.24      | 55775564  | Q5SC49        |
| phosphoprotein, P                                      | 1979 – 3152  | 391  | 41595  | 7.82      | 55775566  | Q5SC57        |
| V                                                      | 1979 – 2653  | 224  | 24096  | 8.86      | 55775564  | Q5SC47        |
| I                                                      | 1979 – 2490  | 171  | 18302  | 10.04     | 55775568  | Q5SC46        |
| matrix protein, M                                      | 3228 – 4481  | 375  | 41580  | 9.52      | 55775568  | Q5SC54        |
| fusion protein, F <sub>0</sub> *                       | 4546 – 6162  | 538  | 58730  | 8.13      | 55775569  | Q5SC53        |
| fusion protein fragment 1, F <sub>1</sub> <sup>#</sup> | -            | 436  | 47345  | 5.99      | -         | -             |
| fusion protein fragment 2, F <sub>2</sub> <sup>#</sup> | -            | 102  | 11402  | 9.67      | -         | -             |
| small hydrophobic protein, SH                          | 6268 – 6441  | 57   | 6833   | 9.82      | 55775560  | Q5SC52        |
| hemagglutinin-neuraminidase, HN*                       | 6614 – 8362  | 582  | 64127  | 7.79      | 55775571  | Q5SC51        |
| large polymerase, L                                    | 8468 – 11815 | 2261 | 256819 | 6.18      | 55775572  | Q5SC50        |

CDS - coding sequence; aa – amino acid; \* - glycoproteins, real  $M_r$  differs from theoretical because of posttranslationally added glycans; <sup>#</sup> fragments F<sub>1</sub> and F<sub>2</sub> are produced from F<sub>0</sub> by cleavage with cell protease furin which recognizes RRHKR motif

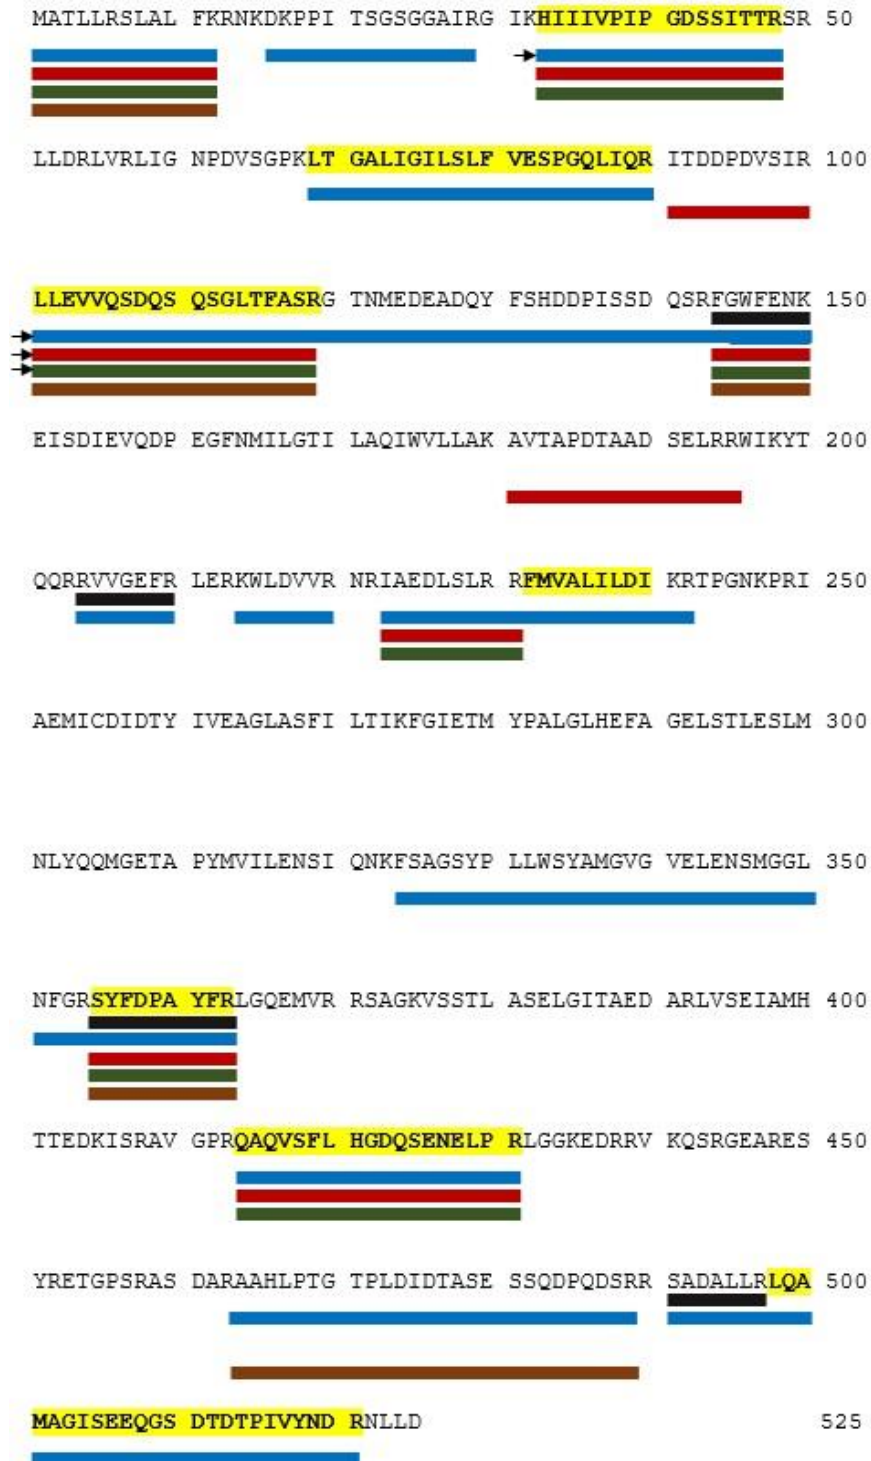

**Figure S1.** Sequence coverage of MEV N bands from UC purified MEV (Fig. 1(c)). Black line – apparent molecular mass 59 kDa, blue line – apparent molecular mass 56 kDa, red line – apparent molecular mass 53 kDa, green line – apparent molecular mass 51 kDa, brown line – apparent molecular mass 42 kDa. Peptides for which the signals were observed in the PMF spectra of a protein form are underlined in corresponding color. Peptides sequenced by MS/MS are highlighted yellow in the sequence. Arrows denote in which protein forms that peptide was sequenced, if not in all.

MSIMGLKVVN SAIFMAVLLT LQTPTGQIHW GNLSKIGVVG IGSASYKVMT 50  


RSSHQSLVIK LMPNITLLNN CTRVEIAEYR RLLRTVLEPI RDALNAMTQN 100

IRPVQSVASS RRHKRFAGVV LAGAALGVAT AAQITAGIAL HQSMLNSQAI 150

DNLRASLETT NOAIEAIRQA GQEMILAVQG VQDYINNELI PSMNQLSCDL 200  
  


IGQKLGKLL RYTEILSLF GPSLRDPISA EISIQALSYA LGGDINKVLE 250  
  
  
  
  


KLGYSGDDL GILESRGIKA RITHVDTESY FIVLSIAYPT LSEIKGVIVH 300  
  
  
  


RLEGVSYNIG SQEWYTTVPK YVATQGYLIS NFEDESSCTFM PEGTVCSQNA 350  


LYPMSPLLQE CLRGSTKSCA RTLVSGSFGN RFILSQGNLI ANCASILCKC 400  
  


YTTGTIINQD PDKILTYIAA DHCPVVEVNG VTIQVGSRRY PDAVYLHRID 450  
  
  
  


LGPPISLERL DVGTNLGNAI AKLEDAKELL ESSDQILRSM KGLSSTSIVY 500  
  
  
  
  


ILIAVCLGGL IGIPALICCC RGRCNKKGEQ VGMSRPLKP DLTGTSKSYV 550

RSL 553

**Figure S2.** Sequence coverage of MEV F bands from UC purified MEV (Fig. 1(c)). Black line – apparent molecular mass 59 kDa, blue line – apparent molecular mass 56 kDa, red line – apparent molecular mass 53 kDa, green line – apparent molecular mass 51 kDa, brown line – apparent molecular mass 42 kDa. Peptides for which the signals were observed in the PMF spectra of a protein form are underlined in corresponding color. Peptides sequenced by MS/MS are highlighted yellow in the sequence. Arrows denote in which protein forms that peptide was sequenced, if not in all.



MATLLRSLAL FKRNKDKPPI TSGSGGAIRG IKHIIIVPIP GDSSITTRSR 50  
 LLDRLVRLIG NPDVSGPKLT GALIGILSLF VESPGQLIQR ITDDPDVSIR 100  
LLEVVSQDQS QSGLTFASRG TNMEDEADQY FSHDDPISSD QSRFGWFENK 150  
 EISDIEVQDP EGFNMILGTI LAQIWVLLAK AVTAPDTAAD SELRRWIKYT 200  
 QRRVVGGEFR LERKWL DVVR NR IAEDLSLR RFMVALILDI KRTPGNKPRI 250  
AEMICDIDTY IVEAGLASFI LTIKFGIETM YPALGLHEFA GELSTLES LM 300  
 NLYQQMGETA PYMVILENSI QNKFSAGSYP LLWSYAMGVG VELENSMGGL 350  
 NFGRSYFDPA YFRLGQEMVR RSAGKVSSTL ASELGITAED ARLVSEIAMH 400  
 TTEDKISR AV GPRQAQVSFL HGDQSENELP RLGGKEDRRV KQSRGEARES 450  
 YRETGPSRAS DARAHLPTG TPLDIDTASE SSQDPQDSRR SADALLRLQA 500  
 MAGISEEQGS DTDTPIVYND RNLLD 525

**Figure S4.** Sequence coverage of MEV N bands from E2 fraction of HIC purified MEV (Fig. 3). Black line – apparent molecular mass 59 kDa, blue line – apparent molecular mass 55 kDa. Peptides for which the signals were observed in the PMF spectra of a protein form are underlined in corresponding color. Peptides sequenced by MS/MS are highlighted yellow in the sequence.

MSSVLKA~~FER~~ FTIEQELQDR GEEGSIPPET LKSAVKVFVI NTPNPTRYQ 50  
→ 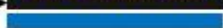

MLNFCLRIIC ~~SONARASHRV~~ GALITLFSLP SAGM~~Q~~NHIRL ~~ADRSP~~EAQIE 100  
  

RCEIDGFEPG TYRLIPNARA ~~NTANEIAAY~~ ~~ALLADDLPPT~~ ~~INNGTPYVHA~~ 150  
→ 

DVEGQPCDEI ~~EQFLDRCYSV~~ ~~LIQAWVMVCK~~ ~~CMTAYDQPAG~~ ~~SADRRFAKYQ~~ 200

QOGRLEARYM ~~LOPEAORLIQ~~ ~~TAIRKSLVVR~~ OYLTFELOLA ~~RRQGLLSNRY~~ 250  
 

YAMVGDIGKY ~~IENSGLTAFF~~ ~~LTLKYALGK~~ ~~WSPLSLAAFT~~ ~~GELTKLRSLM~~ 300  
 

MLYRGLGEQA ~~RYLALLEAPQ~~ ~~IMDFAPGGYP~~ ~~LIFSYAMGVG~~ ~~TVLDVQMRNY~~ 350  


TYARPFLNGY ~~YFQIGVETAR~~ ~~RQQTVDNRV~~ ADDLGLTPEQ RTEVTQLVDR 400  
 

LARGRGAGIP ~~GGPVNPFVPP~~ ~~VQQQPAAVY~~ ~~EDIPALEESD~~ ~~DDGDEDGGAG~~ 450  


FOHGAQAPAV ~~ROGGONDFRA~~ ~~OPLQDPIQAO~~ ~~LFMPLYPOVS~~ ~~NIPNHONHOI~~ 500  


★  
NRIGGMEHOD ~~LLRYNENGDS~~ ~~QQDARGEHGN~~ ~~TFPNNPNQNA~~ ~~QSQVGDWDE~~ 549  


**Figure S5.** Sequence coverage of MUV NP bands from fraction E2 of HIC purified MUV (Fig. 4). Black line – apparent molecular mass 56 kDa, blue line – apparent molecular mass 46 kDa. Peptides for which the signals were observed in the PMF spectra of a protein form are underlined in corresponding color. Peptides sequenced by MS/MS are highlighted yellow in the sequence. Arrows denote in which protein forms that peptide was sequenced, if not in all. Grey star marks position 400 at which C-truncation yields a 45 kDa protein, whereas black star denotes position 513 at which C-truncation yields a 57 kDa protein.

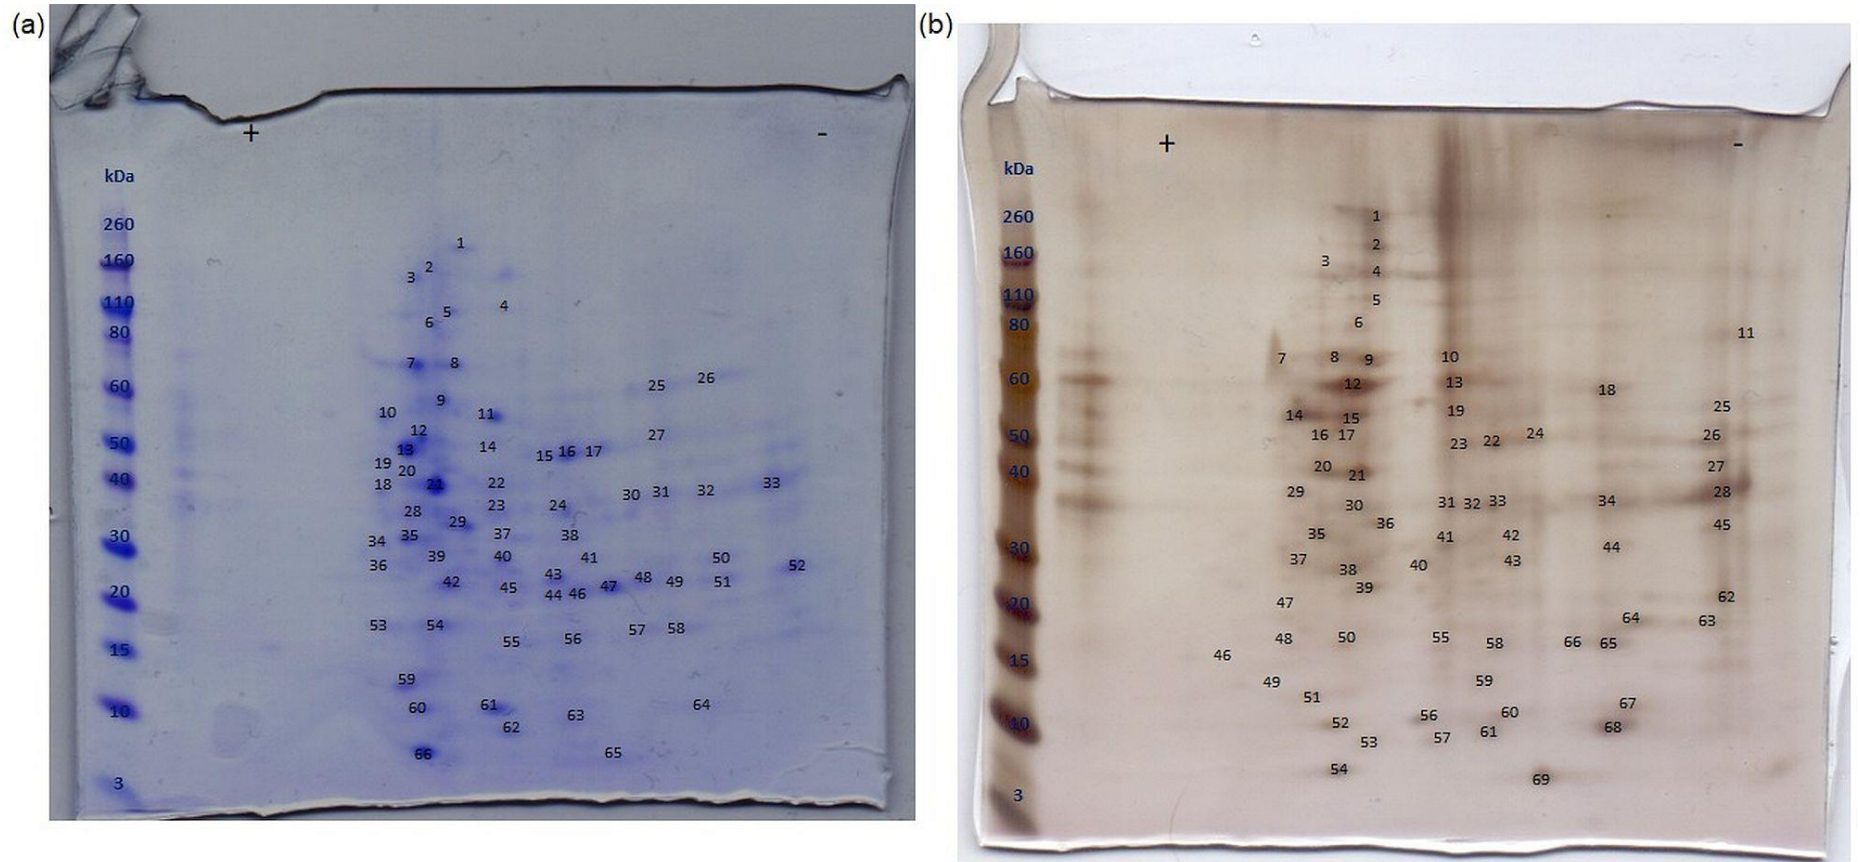

**Figure S6.** 2D gel electrophoresis of (a) MUV (same sample as in Fig. 2(c)) and (b) MEV (same sample as in Fig. 1(c)) purified by UC with protein annotations after MALDI-TOF/TOF MS analysis. List of identified proteins is given in Table S1.



**Table S3.** List of proteins detected in MEV and MUV samples purified by UC and analysed by 2D gel electrophoresis

| MUV         |                                         | MEV         |                      |
|-------------|-----------------------------------------|-------------|----------------------|
| Spot number | protein                                 | Spot number | protein              |
| 1           | plexin B2                               | 1           | ni                   |
| 2           | ni                                      | 2           | ni                   |
| 3           | integrin $\alpha$ V                     | 3           | ni                   |
| 4           | integrin $\alpha$ 3                     | 4           | ni                   |
| 5           | non-muscle myosin heavy chain           | 5           | ni                   |
| 6           | ni                                      | 6           | N                    |
| 7           | HSPA5                                   | 7           | ni                   |
| 8           | HSP70 - mortalin                        | 8           | HSPA5                |
| 9           | HSP60, NP                               | 9           | HSP71                |
| 10          | PDIA3                                   | 10          | moesin               |
| 11          | PDIA3                                   | 11          | ni                   |
| 12          | tubulin $\alpha$                        | 12          | P                    |
| 13          | tubulin $\beta$                         | 13          | P, N                 |
| 14          | heterogeneous nuclear ribonucleoprotein | 14          | N, P                 |
| 15          | $\alpha$ -enolase, P                    | 15          | N, P                 |
| 16          | $\alpha$ -enolase                       | 16          | tubulin $\alpha$     |
| 17          | $\alpha$ -enolase                       | 17          | ni                   |
| 18          | vimentin, actin                         | 18          | ni                   |
| 19          | tubulin $\beta$                         | 19          | N                    |
| 20          | actin, HSP71                            | 20          | actin                |
| 21          | actin                                   | 21          | actin                |
| 22          | actin                                   | 22          | ni                   |
| 23          | annexin A2, $\alpha$ -enolase           | 23          | ni                   |
| 24          | annexin A2, aldolase reductase          | 24          | $\alpha$ -enolase    |
| 25          | NP                                      | 25          | ni                   |
| 26          | NP                                      | 26          | ni                   |
| 27          | ni                                      | 27          | actin                |
| 28          | annexin A2                              | 28          | M, P                 |
| 29          | annexin A4                              | 29          | P, M                 |
| 30          | annexin A2                              | 30          | ni                   |
| 31          | annexin A2                              | 31          | M                    |
| 32          | annexin A2                              | 32          | ni                   |
| 33          | galectin-3                              | 33          | ni                   |
| 34          | ni                                      | 34          | ni                   |
| 35          | annexin A5                              | 35          | annexin A5           |
| 36          | 14-3-3 gamma protein                    | 36          | annexin A4           |
| 37          | ni                                      | 37          | 14-3-3 gamma protein |
| 38          | annexin A2                              | 38          | ni                   |
| 39          | chloride intracellular channel protein  | 39          | ni                   |

**Table S3.** Continued

| MUV         | MEV                                                             | MUV         | MEV                                       |
|-------------|-----------------------------------------------------------------|-------------|-------------------------------------------|
| Spot number | protein                                                         | Spot number | protein                                   |
| 40          | HSPβ1                                                           | 40          | HSPβ1                                     |
| 41          | triosephosphate isomerase,<br>phosphoglycerate mutase           | 41          | P/V                                       |
| 42          | ubiquitin carboxy-terminal<br>hydrolase, sorcin                 | 42          | ni                                        |
| 43          | voltage dependant anion selective<br>channel protein (porin 31) | 43          | triosephosphate isomerase                 |
| 44          | superoxide dismutase                                            | 44          | HSP71                                     |
| 45          | GST, annexin A1                                                 | 45          | moesin                                    |
| 46          | peroxiredoxin, superoxide<br>dismutase                          | 46          | ni                                        |
| 47          | superoxide dismutase                                            | 47          | ni                                        |
| 48          | P, superoxide dismutase                                         | 48          | myosin regulatory protein, light<br>chain |
| 49          | ni                                                              | 49          | ni                                        |
| 50          | P                                                               | 50          | ni                                        |
| 51          | superoxide dismutase,<br>peroxiredoxin                          | 51          | galectin-1                                |
| 52          | peroxiredoxin                                                   | 52          | ni                                        |
| 53          | vimentin                                                        | 53          | ni                                        |
| 54          | annexin A2, Rab7 GTPase                                         | 54          | ni                                        |
| 55          | ni                                                              | 55          | ni                                        |
| 56          | CypA                                                            | 56          | ni                                        |
| 57          | CypA                                                            | 57          | ni                                        |
| 58          | CypA                                                            | 58          | CypA                                      |
| 59          | galectin-1                                                      | 59          | ni                                        |
| 60          | ni                                                              | 60          | ni                                        |
| 61          | protein S100-A11                                                | 61          | ni                                        |
| 62          | protein S100-A11                                                | 62          | peroxiredoxin                             |
| 63          | protein S100-A11                                                | 63          | cofilin                                   |
| 64          | ni                                                              | 64          | cofilin                                   |
| 65          | ni                                                              | 65          | CypA                                      |
| 66          | ni                                                              | 66          | CypA                                      |
|             |                                                                 | 67          | ni                                        |
|             |                                                                 | 68          | ni                                        |
|             |                                                                 | 69          | ribosomal protein S27a                    |

ni – not identified
